# Supplementary material
Source: HighWire-hosted journal article supplement (https://erj.ersjournals.com/content/57/3/2004573)
Supplement: inline-supplementary-material-1 [file inline-supplementary-material-1.pdf]

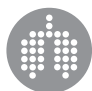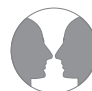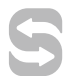

SHAREABLE PDF

# Connecting the dots: the role of connexins in the pulmonary vascular response to hypoxia

Martin Witzernath<sup>1</sup> and Wolfgang M. Kuebler<sup>2</sup>

**Affiliations:** <sup>1</sup>Dept of Infectious Diseases and Respiratory Medicine, Charité – Universitätsmedizin Berlin, Berlin, Germany. <sup>2</sup>Institute of Physiology, Charité – Universitätsmedizin Berlin, Berlin, Germany.

**Correspondence:** Wolfgang M. Kuebler, Institute of Physiology, Charité – Universitätsmedizin Berlin, Chariteplatz 1, Berlin, Berlin 10117, Germany. E-mail: Wolfgang.Kuebler@charite.de

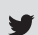

@ERSpublications

**Gap junctions, composed of connexins 37, 40 or 43, mediate the pulmonary vascular response to acute and chronic hypoxia as they propagate the hypoxic signal from the site of gas exchange retrogradely to the feeding arteri(ol)es** <https://bit.ly/3orJKXM>

**Cite this article as:** Witzernath M, Kuebler WM. Connecting the dots: the role of connexins in the pulmonary vascular response to hypoxia. *Eur Respir J* 2021; 57: 2004573 [<https://doi.org/10.1183/13993003.04573-2020>].

This single-page version can be shared freely online.

## *To the Editor:*

We read with great interest the recent manuscript by BOUVARD *et al.* [1], which suggested the gap junctional protein connexin-43 (Cx43) to be a promising target for the treatment of chronic hypoxic pulmonary hypertension (CHPH). Therein, the authors demonstrated increased Cx43 expression in human pulmonary arteries of CHPH patients, while heterozygous Cx43 deficient mice were partially protected from CHPH.
